# Supplementary material
Source: PubMed Central journal article supplement (PMC4577044)
Supplement: supp_jiv205_jiv205supp_table1.pdf [file supp_jiv205_jiv205supp_table1.pdf]

Table 1. The quantitative distribution of parasites across brain and other organs for autopsy cases. Each organ is listed with the corresponding measure of parasite sequestration and number of cases counted for the data presented. The cases are divided by diagnosis. For all rows, the Kruskal Wallis test (differences among groups, non-parametric) and non-parametric trend test (decreasing value from left to right) were highly significantly at 0.0001 or less.

|                |                 | n         | CM1                | CM2                  | SMA              | CM3             | Other          |
|----------------|-----------------|-----------|--------------------|----------------------|------------------|-----------------|----------------|
| <b>Brain</b>   | <b>%VP</b>      | <b>99</b> | 87 [ 76.6 - 95.8 ] | 84.6 [ 61.4 - 93.0 ] | 0.5 [ 0 - 2.85 ] | 0 [ 0 - 2.6 ]   | 0 [ 0 - 0 ]    |
|                | <b>UPP/100v</b> | <b>99</b> | 11 [ 0 - 50 ]      | 6.6 [ 0 - 102 ]      | 0 [ 0 - 2 ]      | 0 [ 0 - 0 ]     | 0 [ 0 - 0 ]    |
|                | <b>PP/100v</b>  | <b>99</b> | 201 [ 147 - 396 ]  | 202 [ 47 - 314 ]     | 0 [ 0 - 0.5 ]    | 0 [ 0 - 0 ]     | 0 [ 0 - 0 ]    |
|                | <b>p/10hpf</b>  | <b>99</b> | 62 [ 58 - 102 ]    | 59 [ 35 - 84 ]       | 0.1 [ 0 - 0.5 ]  | 0 [ 0 - 0.5 ]   | 0 [ 0 - 0 ]    |
| <b>Heart</b>   | <b>p/10hpf</b>  | <b>82</b> | 42 [ 2 - 123 ]     | 14 [ 5 - 43 ]        | 18 [ 0 - 19 ]    | 0 [ 0 - 4 ]     | 0 [ 0 - 2 ]    |
| <b>Lung</b>    | <b>p/10hpf</b>  | <b>94</b> | 43 [ 26 - 115 ]    | 29 [ 17 - 71 ]       | 3 [ 1 - 23 ]     | 8 [ 5 - 22 ]    | 7 [ 2 - 20 ]   |
| <b>Stomach</b> | <b>p/10hpf</b>  | <b>87</b> | 49 [ 16 - 375 ]    | 52 [ 13 - 209 ]      | 10 [ 0 - 27 ]    | 3 [ 1 - 13 ]    | 1 [ 0 - 4 ]    |
| <b>Jejunum</b> | <b>p/10hpf</b>  | <b>82</b> | 93 [ 22 - 368 ]    | 87 [ 31 - 542 ]      | 27 [ 11 - 42 ]   | 18 [ 4 - 54 ]   | 0 [ 0 - 26 ]   |
| <b>Ileum</b>   | <b>p/10hpf</b>  | <b>87</b> | 86 [ 3 - 265 ]     | 51 [ 13 - 108 ]      | 11 [ 2 - 43 ]    | 11 [ 1 - 26 ]   | 2 [ 0 - 6 ]    |
| <b>Colon</b>   | <b>p/10hpf</b>  | <b>83</b> | 142 [ 10 - 379 ]   | 69 [ 17 - 405 ]      | 38 [ 6 - 70 ]    | 13 [ 0 - 28 ]   | 0 [ 0 - 7 ]    |
| <b>Spleen</b>  | <b>p/10hpf</b>  | <b>92</b> | 63 [ 47 - 113 ]    | 10 [ 3 - 115 ]       | 9 [ 5 - 15 ]     | 3 [ 2 - 9 ]     | 7 [ 2 - 11 ]   |
| <b>Skin</b>    | <b>p/10hpf</b>  | <b>48</b> | 19 [ 5 - 138 ]     | 109 [ 40 - 316 ]     | 0 [ 0 - 2.7 ]    | 0 [ 0 - 3 ]     | 0 [ 0 - 0 ]    |
| <b>Total</b>   |                 |           | 488 [ 217 - 1237 ] | 354 [ 159 - 1598 ]   | 51 [ 16 - 179 ]  | 68 [ 35 - 106 ] | 34 [ 15 - 47 ] |

%VP = % of vessels parasitized out of at least 100 counted vessels; UPP/100v = number of unpigmented parasites counted in 100 vessels; pp/100v = number of pigmented parasites counted in 100 vessels; p/10hpf = number of parasites counted in 10 high powered fields (1000x oil immersion).

n = number of cases used total for measure; except for SMA, all diagnoses had 6+ cases per organ; indeterminant cases were not used in calculations

All data are median and interquartile range (IQR)

Brain counts are provided as either unpigmented parasites (UPP), pigmented parasites (PP) per 100 capillaries, and total parasites per 10 hpf (p) which was calculated by dividing the total number of parasites in 100v by 4, which approximates the number of parasites in capillaries per 10 high powered fields (1000x); however, because this counting method only includes capillaries, this number underestimates the total number of parasites present in any section.

All other organ counts are provided as parasites per 10 high powered fields (1000 x)

Total represents the sum of all counts (per 10 hpf) for each organ where available. If not count was available, zero was used; thus, this "total" undrepresents the true range as cases with missing organs may be undercounted.
